# Supplementary material for: Mechanistic insights into the acetate-accelerated synthesis of crystalline ceria nanoparticles
Source: Royal Society of Chemistry journal article supplement (doi:10.1039/d0ra02309d), 2020-01-01
Supplement: d0ra02309d1.pdf [file d0ra02309d1.pdf]

## Electronic Supplementary Information

### **Mechanistic insights into the acetate-accelerated synthesis of crystalline ceria nanoparticles**

Tamra J. Fisher,<sup>1,†</sup> Deepa Choudhry,<sup>1,†</sup> Kaitlynn Derr,<sup>2</sup> Soodabeh Azadehranjbar,<sup>3</sup> Dan Stasko,<sup>2</sup> and Chin Li Cheung\*,<sup>1</sup>

1. Department of Chemistry, University of Nebraska-Lincoln, Lincoln, NE 68588, United States.

2. Missouri Western State University, St. Joseph, MO 64507, United States.

3. Department of Mechanical and Materials Engineering, University of Nebraska-Lincoln, Lincoln, NE 68588, United States.

\*Corresponding author. 514A Hamilton Hall, Lincoln, NE 68505, U.S.A. Email address: ccheung2@unl.edu

† These authors contributed equally to this manuscript.

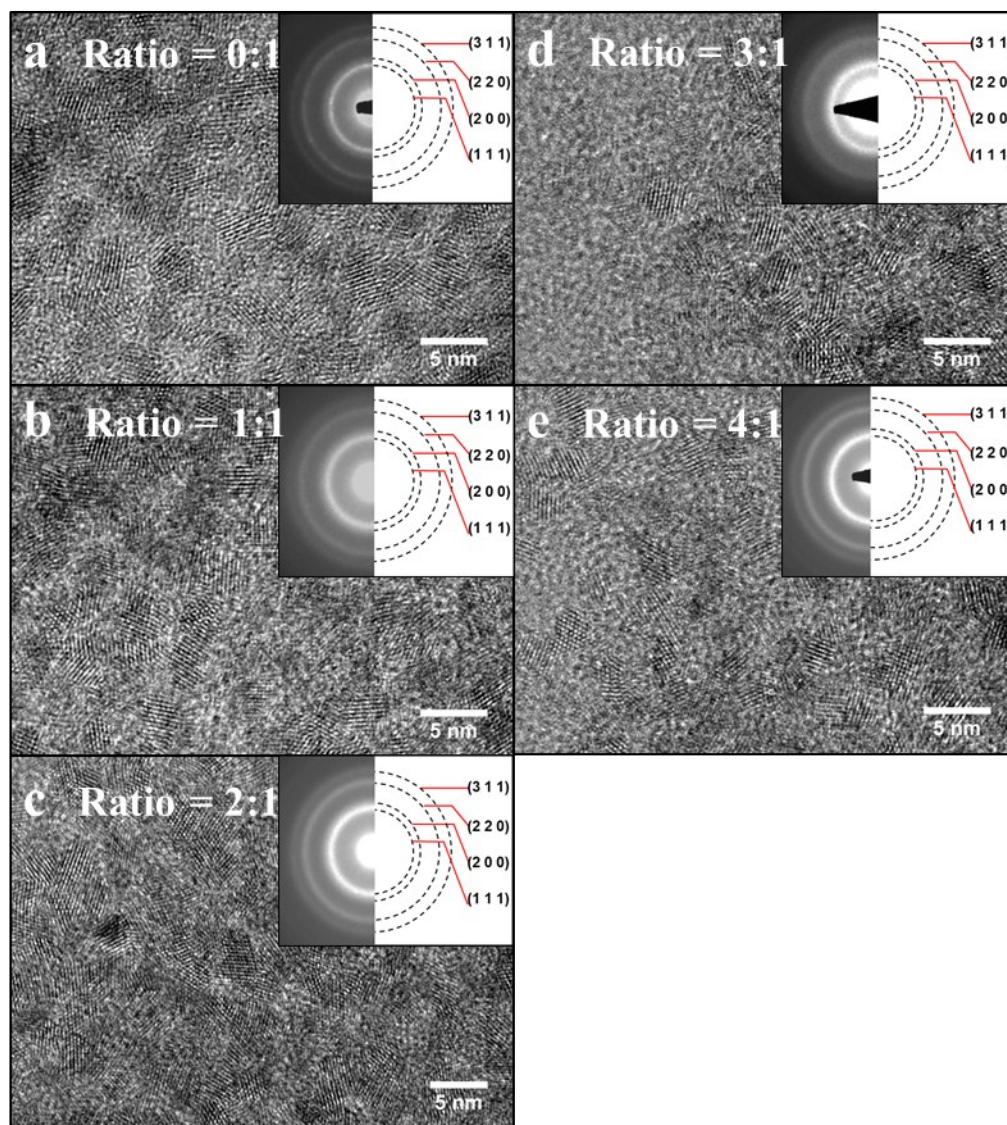

**Fig. S1** TEM images of ceria NPs produced using of reactants ratios (LiOAc and  $\text{Ce}(\text{NO}_3)_3$ ) of (a) 0:1, (b) 1:1, (c) 2:1, (d) 3:1, and (e) 4:1. (insets) Indexed corresponding SAED patterns.

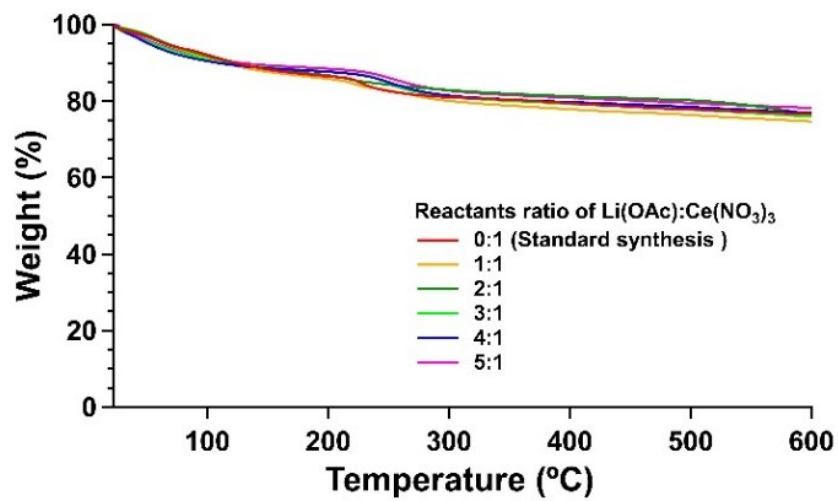

**Fig. S2** TGA results for ceria NPs produced using LiOAc and Ce(NO<sub>3</sub>)<sub>3</sub> reactants with ratios of 0:1, 1:1, 2:1, 3:1, 4:1, and 5:1.
